# Supplementary material
Source: Springer Nature journal article supplement (https://www.springermedizin.de/resource/supplementary/11689_2013_44_MOESM1_ESM.pdf/9673106)

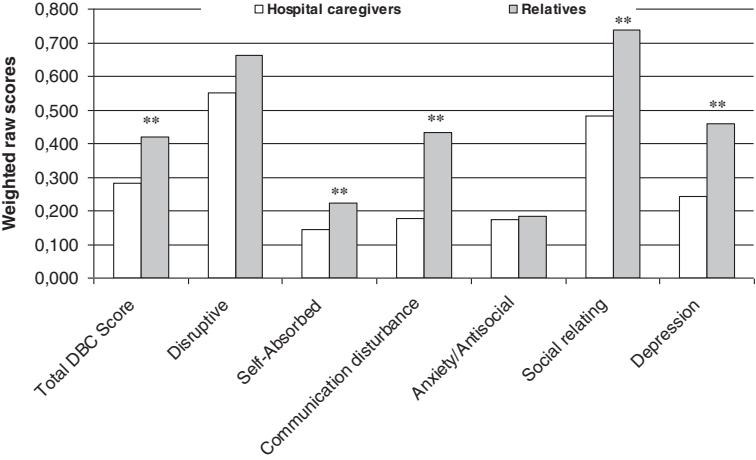

Supplement: MOESM1 [file 9673106]
